1 **Calcineurin broadly regulates the initiation of skeletal muscle-specific gene expression by**  
2 **binding target promoters and facilitating the interaction of the SWI/SNF chromatin**  
3 **remodeling enzyme**

4

5 Running title: Calcineurin globally promotes myogenic gene expression

6

7 Hanna Witwicka<sup>a</sup>, Jumpei Nogami<sup>b</sup>, Sabriya A. Syed<sup>a</sup>, Kazumitsu Maehara<sup>b</sup>, Teresita Padilla-  
8 Benavides<sup>a</sup>, Yasuyuki Ohkawa<sup>b</sup>, Anthony N. Imbalzano<sup>a#</sup>

9

10 <sup>a</sup> Department of Biochemistry and Molecular Pharmacology, University of Massachusetts  
11 Medical School, Worcester, MA, 01605. USA.

12 <sup>b</sup> Division of Transcriptomics, Medical Institute of Bioregulation, Kyushu University, 3-1-1  
13 Maidashi, Higashiku, Fukuoka 812-8582, Japan.

14

15 <sup>#</sup> To whom correspondence should be addressed. tel: (+1) 508-856-1029; E-mail:

16 Anthony.Imbalzano@umassmed.edu

17

18

19

20

21 **ABSTRACT**

22 Calcineurin (Cn) is a calcium-activated serine/threonine protein phosphatase that is broadly  
23 implicated in diverse cellular processes, including the regulation of gene expression. During  
24 skeletal muscle differentiation, Cn activates the NFAT transcription factor but also promotes  
25 differentiation by counteracting the negative influences of protein kinase C beta (PKC $\beta$ ) via  
26 dephosphorylation and activation of BRG1, an enzymatic subunit of the mammalian SWI/SNF  
27 ATP-dependent chromatin remodeling enzyme. Here we identified four major temporal patterns  
28 of Cn-dependent gene expression in differentiating myoblasts and determined that Cn is broadly  
29 required for the activation of the myogenic gene expression program. Mechanistically, Cn  
30 promotes gene expression through direct binding to myogenic promoter sequences and facilitating  
31 the binding of BRG1, other SWI/SNF subunit proteins, and MyoD, a critical lineage determinant  
32 for skeletal muscle differentiation. We conclude that the Cn phosphatase directly impacts the  
33 expression of myogenic genes by promoting ATP-dependent chromatin remodeling and formation  
34 of transcription-competent promoters.

35

## 36 INTRODUCTION

37 Myoblast differentiation is an essential process during skeletal muscle development where  
38 mononuclear myoblasts withdraw from the cell cycle and undergo fusion and other morphological  
39 changes to form multi-nucleated myotubes. This process is coordinated by the family of myogenic  
40 regulatory factors (MRFs) that include MyoD, myogenin, Myf5, and Mrf4 in cooperation with the  
41 MEF family of transcription factors and other auxiliary transcriptional regulators. MRFs regulate  
42 the commitment, determination, and differentiation of skeletal muscle progenitor cells. The ability  
43 of MRFs to drive the myogenic gene expression needed for differentiate requires remodeling of  
44 chromatin at target genes that depends on the recruitment of histone modifying and chromatin  
45 remodeling complexes that alter nucleosome structure and the local chromatin environment (1-3).

46 The SWI/SNF (SWItch/Sucrose Non-Fermentable) complexes are large, multiprotein,  
47 ATP-dependent chromatin remodeling enzymes (4-6) that alter nucleosome structure to promote  
48 transcription, replication, recombination and repair (7-10). The chromatin remodeling activity of  
49 the SWI/SNF enzyme is required for the initiation of many developmental and differentiation  
50 programs (11-14) including activation of myogenic genes upon differentiation signaling (15, 16).  
51 Mammalian SWI/SNF complexes contain one of two related ATPase subunits, either Brahma  
52 related gene 1 (Brg1) or the ATPase Brahma (Brm), and a collection of at least 9 to 12 associated  
53 protein known as Brg1/Brm - associated factors (Bafs) (4, 17, 18). Mammalian SWI/SNF enzyme  
54 function can be influenced by the assembly of different combination of Baf subunits around the  
55 different ATPases (12, 19). Furthermore, signal transduction pathways promote specific  
56 posttranslational modifications of SWI/SNF subunit proteins that influence enzyme activity (15,  
57 20-23). In skeletal muscle differentiation, the p38 mitogen-activated protein kinase (MAPK)  
58 phosphorylates the Baf60c subunit, which then allows the recruitment of the rest of SWI/SNF

59 remodeling complex to myogenic promoters (24). Our group previously showed that casein kinase  
60 2 (CK2) phosphorylates Brg1 to regulate *Pax7* expression and to promote myoblast survival and  
61 proliferation (21), while protein kinase C  $\beta$ 1 (PKC $\beta$ 1) phosphorylates Brg1, which represses  
62 chromatin remodeling function and, consequently, myogenesis (20).

63 Calcineurin (Cn) is a serine/threonine phosphatase that is regulated by changes in the  
64 intracellular concentration of  $\text{Ca}^{2+}$  (25). Cn is a heterodimer formed by association of catalytic  
65 subunit A (CnA) and regulatory subunit B (CnB) (26, 27). Its mechanism of action has been  
66 characterized extensively in lymphocytes, where activated Cn dephosphorylates Nuclear Factor of  
67 Activated T-cell (NFAT) transcription factors. Dephosphorylated NFAT translocates to the  
68 nucleus and binds to promoter regions of target genes to regulate gene expression (28-31). In  
69 skeletal muscle, Cn-dependent binding of NFAT to target promoters controls skeletal muscle fiber  
70 type and primary muscle fiber number during development (32, 33) and growth of multinucleated  
71 muscle cells (34-36). Cn is also required for the initiation of skeletal muscle differentiation by  
72 mechanisms that are independent of NFAT (37, 38). More recently, we reported a novel function  
73 for Cn in chromatin remodeling. We showed that Cn is bound to Brg1 at the myogenin promoter,  
74 where it dephosphorylates Brg1 shortly after cells start the differentiation process to positively  
75 promote differentiation (20).

76 The aim of the current study was to explore the global effect of Cn on gene expression  
77 in myoblasts. We demonstrate that inhibition of Cn in myoblasts globally down-regulates  
78 expression of genes important for muscle structure and function. We identified four major  
79 temporal patterns of Cn-dependent gene expression. Mechanistically, we show that Cn acts as  
80 a chromatin binding regulatory protein, interacting with Brg1 to facilitate SWI/SNF enzyme  
81 and MyoD binding to myogenic gene regulatory sequences.

## 82 MATERIALS AND METHODS

83 **Antibodies.** Rabbit antisera to Brg1 and MyoD were previously described (39, 40). Pan-  
84 Calcineurin A (#2614), Baf170 (#12769), and Baf250A (#12354) antibodies were from Cell  
85 Signaling Technologies (Danvers, MA). Brg1 antibody (G-7, #sc-17796) was from Santa Cruz  
86 Biotechnologies (Santa Cruz, CA) and was used for western blotting and immunoprecipitation  
87 experiments.

88 **Cell culture.** C2C12 cells were purchased from ATCC (Manassas, VA) and maintained at  
89 subconfluent densities in Dulbecco's modified Eagle's medium (DMEM) supplemented with 10%  
90 FBS and 1% penicillin/streptomycin in a humidified incubator at 37°C in 5% CO<sub>2</sub>. For  
91 differentiation, cells at > 80% confluency were switched to DMEM medium supplemented with  
92 2% horse serum and 2 µg/ml of bovine insulin (Sigma-Aldrich, St. Louis, MO). FK506 (Cayman  
93 Chemical, Ann Arbor, MI) was added to the culture 24h before initiating differentiation and  
94 maintained in the differentiation media at 2µM. Media containing FK506 was changed every  
95 day.

96 Mouse satellite cells were isolated from leg muscles of 3- to 6-week old Brg1 conditional  
97 mice using Percoll sedimentation followed by differential plating as described previously (20).  
98 Mice were housed in the animal care facility at the University of Massachusetts Medical School  
99 and used in accordance with a protocol approved by the Institutional Animal Care and Use  
100 Committee. Brg1 depleted primary myoblasts expressing wild type (WT) Brg1 or Brg1 mutated  
101 at sites of PKCβ1/Cn activity were generated as described (20). Primary myoblasts were grown  
102 and differentiated as described (20) on plates coated overnight in 0.02% collagen (Advanced  
103 BioMatrix, San Diego, CA).

104 **RNA isolation and gene expression analysis.** RNA was extracted using TRIzol Reagent  
105 (Invitrogen, Carlsbad, CA) and the yield determined by measuring OD<sub>260</sub>. 1µg of total RNA was  
106 subjected to reverse transcription with a QuantiTect Reverse Transcription Kit (Qiagen,  
107 Germantown, MD). The resulting cDNA was used for quantitative PCR using a Fast SYBR green  
108 master mix (Applied Biosystems, Foster City, CA). Amplification reactions were performed in  
109 duplicate in 10 µl final volume that included the following: 25 ng of template, 0.3 µM primers, 2×  
110 SYBR Green Master Mix. Reactions were processed in QuantStudio3 (Applied Biosystems).  $\Delta C_t$   
111 for each gene was calculated and represents the difference between the  $C_t$  value for the gene of  
112 interest and that of the reference gene, *Eef1a1*. Fold-changes were calculated using the  $2^{-\Delta\Delta C_t}$   
113 method (41). Primer sequences and their accession numbers of PCR products are shown in  
114 **Supplementary Table S1.**

115 **RNA-Seq and Data Analysis.** Total RNA from C2C12 cells treated with FK506 or with DMSO  
116 was isolated from proliferating and differentiating cultures (time 0, 24h and 72h) with TRIzol,  
117 and libraries were constructed as described (42). The libraries were sequenced using the Illumina  
118 HiSeq 1500 and the resulting reads were mapped onto the reference mouse genome (GRCm38)  
119 by HISAT2 (ver. 2.2.6) (43). Read counting per gene was performed with HTseq (ver. 0.6.1)  
120 (44) such that duplicates in unique molecular identifiers were discarded. After converting UMI  
121 counts to transcript counts as described (45), differentially expressed genes, (those with adjusted  
122 p-value <0.1) were extracted by the R library DESeq2 (version 1.10.1) (46). The differentially  
123 expressed genes and cluster analyses are listed in **Supplementary Tables S2 and S3**. Gene  
124 ontology (GO) term identification was performed on metaspape: <http://metaspape.org>. Cluster  
125 gene analysis was performed using clusterProfiler (ver. 3/10.0) software (47). RNA-seq data

126 were deposited at the Gene Expression Omnibus (GEO) database under accession number  
127 GSE125914. The reviewer access token is krexcswllodxwn.

128

129 **Chromatin immunoprecipitation (ChIP) assay.** Chromatin immunoprecipitation assays were  
130 performed as previously described (20, 48) with some modifications. Briefly, cells ( $4 \times 10^6$ ) were  
131 cross-linked with 1% formaldehyde (Ted Pella Inc., Redding, CA) for 10 minutes at room  
132 temperature. After quenching the formaldehyde with 125 mM glycine for 5 minutes, fixed cells  
133 were washed twice with PBS supplemented with protease inhibitor cocktail and lysed with 1 ml  
134 buffer A (10 mM Tris HCl, pH 7.5, 10 mM NaCl, 0.5% NP40, 0.5  $\mu$ M DTT and protease  
135 inhibitors) by incubation on ice for 10 minutes. The nuclei were pelleted, washed with 1 ml of  
136 buffer B (20 mM Tris HCl, pH 8.1, 15 mM NaCl, 60 mM KCl, 1 mM  $\text{CaCl}_2$ , 0.5  $\mu$ M DTT) and  
137 incubated for 30 minutes at 37°C in the presence of 1000 gel units of MNase (#M0247S, NEB,  
138 Ipswich, MA) in 300  $\mu$ l volume of buffer B. The reaction was stopped by adding 15  $\mu$ l of 0.5 M  
139 EDTA. Nuclei were pelleted and resuspended in 300  $\mu$ l of ChIP buffer (100 mM Tris HCl, pH 8.1,  
140 20 mM EDTA, 200 mM NaCl, 0.2 % sodium deoxycholate, 2% Triton X 100 and protease  
141 inhibitors), sonicated for 10 minutes (30 sec-on/ 30 sec-off) in a Bioruptor UCD-200 (Diagenode,  
142 Denville, NJ) and centrifuged at 15,000 rpm for 5 minutes. The fragmented chromatin was between  
143 200–500 bp as analyzed on agarose gels. Chromatin concentration was measured using Qubit 3  
144 (Invitrogen). After preclearing with protein A agarose, chromatin (2-4  $\mu$ g) was subjected to  
145 immunoprecipitation with specific antibodies listed above, or with anti-IgG as negative control at  
146 4°C overnight, and immunocomplexes were recovered by incubation with protein A agarose  
147 magnetic beads (Invitrogen). Sequential washes of 5 minutes each were performed with buffers  
148 A-D (Buffer A: 50 mM Tris pH 8.1, 10 mM EDTA, 100 mM NaCl, 1% Triton X 100, 0.1% sodium

149 deoxycholate; Buffer B: 50 mM Tris pH 8.1, 2 mM EDTA, 500 NaCl, 1% Triton-X100, 0.1%  
150 sodium deoxycholate; Buffer C: 10 mM Tris pH 8.1, 1 mM EDTA, 0.25 M LiCl<sub>2</sub>; 1% NP-40, 1%  
151 sodium deoxycholate; Buffer D: 10 mM Tris pH 8.1, 1 mM EDTA), immune complexes were  
152 eluted in 100 µl of elution buffer (0.1 M NaHCO<sub>3</sub>, 1% SDS) for 30 minutes at 65°C, incubated  
153 with 1 µl of RNase A (0.5 mg/ml) for 30 minutes at 37°C, and reverse cross-linked by adding 6  
154 µl of 5M NaCl and 1 µl of proteinase K (1 mg/ml) overnight at 65°C. DNA was purified using the  
155 ChIP DNA clean & concentrator kit (Zymo Research, Irvine, CA). Bound DNA fragments were  
156 analyzed by quantitative PCR using the SYBR Green Master Mix. Quantification was performed  
157 using the fold enrichment method ( $2^{-(Ct_{\text{sample}} - Ct_{\text{IgG}})}$ ) and shown as relative to a control region, the  
158 promoter for the *Pdx1* gene. Primer sequences are listed in **Supplemental Table S1**. Primer  
159 positions for each promoter are shown schematically in **Supplemental Figure S1**.

160 **Immunoprecipitation.** 100 mm dishes of 24h differentiated C2C12 cells treated with FK506 or  
161 with DMSO or 100 mm dishes of primary myoblasts expressing wildtype or Brg1 mutants were  
162 washed with ice-cold PBS twice and lysed in 0.5 ml of lysis buffer (50 mM Tris-HCl, pH 7.5, 150  
163 mM NaCl, 1% Nonidet P-40, 0.5% sodium deoxycholate, 1mM CaCl<sub>2</sub> and supplemented with  
164 complete protease inhibitors). Lysates were cleared by centrifugation and precleared with  
165 PureProteome Protein A magnetic beads (Millipore) for 2 hours at 4°C. Next, cell extract was  
166 incubated with 10 µl of Pan-Calceinurin A antibody (Cell Signaling Technologies) or 10 µl of  
167 Brg1 antisera overnight at 4°C, followed by incubation with 100 µl with PureProteome Protein A  
168 mix magnetic beads. After extensive washing of beads with washing buffer (24 mM Tris-HCl, pH  
169 7.5, 300 NaCl, 0.5% NP-40 and 1mM CaCl<sub>2</sub>), precipitated proteins were eluted in Laemmli buffer  
170 and detected by western blot analysis using chemiluminescent detection.



171 **Statistical analysis.** All quantitative data are shown as mean +/- the standard deviation (SD) of at  
172 least three (n=3) biological replicates for each experiment. Statistical analysis was performed using  
173 GraphPad Prism Student's t- test (GraphPad Software Inc.). For all analyses, a *P*-value of less than  
174 0.05 was considered to be statistically significant.

## 175 RESULTS

### 176 RNA-seq identification of genes differentially expressed in myoblasts treated with calcineurin 177 inhibitor FK506

178 To better understand the involvement of calcineurin in the gene regulation program underlying  
179 myogenesis, we compared the transcriptomes of C2C12 myoblasts at three time points of  
180 differentiation (0, 24, and 72 h post-induction of differentiation) in cells treated with the Cn  
181 inhibitor, FK506, with those of control cells. FK506 inhibits the phosphatase activity of Cn by  
182 binding to the immunophilin FKB12; the drug-bound FKB12 binds to and blocks Cn function (28).  
183 Myogenic gene expression is temporally regulated, with different genes expressed with different  
184 kinetics during differentiation (49-51). We analyzed gene expression 24 h and 72 h after the  
185 induction of differentiation to distinguish the impact of Cn inhibition on genes expressed at early  
186 or late times of myogenesis.

187 At 24h post-differentiation, 156 genes were differentially expressed in the presence of  
188 FK506 [false discovery rate (FRD) < 0.05]. Fewer genes were up-regulated (53) than were  
189 downregulated (103). At the later time point of differentiation (72h), 648 genes were differentially  
190 expressed. More genes were up-regulated (373) than were downregulated (275) (**Fig. 1A, B**). In  
191 confluent myoblasts at the onset of differentiation (0h), only 21 genes were differentially expressed  
192 in the presence of FK506. The complete RNA-seq analysis of differentially expressed genes is  
193 shown in **Supplementary Table S2**. Gene ontology analysis of genes downregulated by  
194 calcineurin inhibition at the 24 and 72h time points demonstrated that these genes are involved in  
195 muscle differentiation and related functions (**Fig. 1C** and **Supplementary Fig. S2**). Specific  
196 myogenic genes were identified and labeled on the volcano plots in **Fig. 1A**. In contrast, we  
197 observed up-regulation of genes associated with ossification, response to interferon and viruses,

198 and cardiovascular and blood vessel development. These results are potentially consistent with  
199 documented roles for Cn in the regulation of NFAT function in these processes (52-54). We  
200 performed *de novo* motif analysis on the differentially expressed genes. The most significantly  
201 enriched motifs at the 24h post-differentiation were for Mef2 transcription factors and E-boxes  
202 bound by the MRFs Myf5, myogenin and MyoD (**Fig. 1D**). These findings indicate that genes that  
203 require calcineurin for expression are also regulated by myogenic regulatory factors, strongly  
204 reinforcing the connection between Cn and expression of the myogenic gene program. At the 72h  
205 time point, the most significantly enriched motif was the interferon regulatory factor (IRF) binding  
206 sequence (**Fig. 1D**). This is consistent with the identification of G0 terms including response to  
207 interferons and with findings that IRFs regulate expression of vascular cell adhesion molecule 1  
208 (VCAM-1) receptor that mediates cell-cell adhesion and is important for myoblast fusion (55, 56).  
209 We also note the continued presence of MRF and Mef2 protein binding sites at Cn-regulated genes  
210 at late times of differentiation.

211  
212 **Global expression analysis reveals four major temporal gene expression patterns that are**  
213 **dependent on Cn**

214 We continued our analysis by identifying the groups of genes that showed treatment-specific changes  
215 in gene expression over time. In total, 308 genes were identified. We analyzed the expression patterns  
216 of these differentially expressed genes using Cluster Profiler (47). Genes differentially expressed  
217 over time were clustered into 4 major groups, graphically presented by heat map (**Fig. 2A**) and  
218 expression kinetics (**Fig. 2B**). We performed GO analysis for the differentially expressed genes in  
219 these 4 clusters to gain additional insight into the biological processes regulated by calcineurin during  
220 myoblast differentiation (**Fig. 2C**). Cluster 1 included 95 genes that were down-regulated during

221 differentiation but were unchanged in the presence of the Cn inhibitor. GO terms significantly  
222 enriched for this group of differentially expressed genes related to cell migration, motility and  
223 adhesion. In addition, Cluster 1 included Inhibitor of differentiation (Id) proteins 1, 2 and 3  
224 (**Supplementary Table S3**). Id proteins interact with MyoD and related MRFs prior to differentiation  
225 to repress transcription activation activity. Id1 and Id3 have previously been identified as genes  
226 repressed by Cn during the activation of skeletal muscle cell differentiation (38). Cluster 2 contained  
227 80 genes that were up-regulated during myoblast differentiation but were inhibited or delayed in the  
228 presence of FK506. GO terms significantly enriched for Cluster 2 genes were related to muscle  
229 structure and function. Cluster 3 was composed of 108 genes that were expressed at relatively  
230 constant levels across the differentiation time course but that were significantly up-regulated in the  
231 presence of FK506 expression. GO analysis of Cluster 3 genes identified genes implicated in immune  
232 response of cells. Cluster 4 had 25 genes with an unusual profile. These genes were up-regulated in  
233 the presence of FK506 in proliferating cells and in cells at the onset of differentiation, but were down-  
234 regulated by FK506 treatment as differentiation advanced. No specific GO terms were identified for  
235 this Cluster 4. A complete list of genes in each of the clusters with their log fold change and FDR  
236 values are shown in **Supplementary Table S3**. These data suggests that calcineurin regulates  
237 multiple and diverse groups of genes during myoblast differentiation.

238 For further analysis, we focused on genes that were down-regulated in the presence of  
239 FK506 and are important for muscle structure and/or function (**Fig. 1A**). We first measured mRNA  
240 expression level of several such genes to validate RNA-seq results; *Myog*, *Ckm*, *Myh4*, *Mymk*,  
241 *Tnnt3*, *Acta1* and *Cav3* were analyzed by RT-qPCR. As expected, each of these genes were  
242 increased over the course of the differentiation time course and each was significantly down-  
243 regulated by exposure to the Cn inhibitor, FK506 (**Fig. 3**). These results confirmed that inhibition

244 of Cn during myoblast differentiation impairs expression of multiple myogenic genes that are  
245 normally activated during differentiation.

246

### 247 **Inhibition of calcineurin function prevents its binding to myogenic promoters**

248 We previously showed that Cn associates with Brg1 and binds to the myogenin promoter early  
249 after the start of the differentiation process (20). We hypothesized that the same model might be  
250 true for other myogenic genes. Alternatively, Cn may directly regulate the myogenin promoter but  
251 indirectly regulate other downstream genes and via the dependency of other genes on myogenin  
252 for completing the differentiation process (57, 58). We performed chromatin immunoprecipitation  
253 assays on the same panel of myogenic genes examined in Fig. 3. PCR primers for ChIP were  
254 designed to amplify the E-box containing regions within 1.5 Kb upstream of the TSS  
255 (**Supplementary Figure S1**). Cn did not interact with myogenic genes regulatory sequences in  
256 proliferating myoblasts (GM), was weakly bound in undifferentiated cells at the start of  
257 differentiation (0h DM), and was bound at all myogenic gene promoters in differentiated (48h  
258 DM) cells (**Fig. 4**). We conclude that Cn binding to myogenic promoters is a general occurrence  
259 and FK506-mediated inhibition of Cn function impairs its ability to interact with target gene  
260 promoters. The results suggest that Cn is a direct regulator of many, if not all, myogenic genes.

261

### 262 **Cn inhibition blocks the interaction of the ATPase Brg1 and other subunits of the** 263 **mammalian SWI/SNF complex with myogenic promoters**

264 We also performed ChIP assays to determine whether Brg1 recruitment to myogenic regulatory  
265 sequences was dependent on calcineurin. We observed recruitment of Brg1 to regulatory  
266 sequences in differentiated (48h DM) cells at all the tested myogenic genes. In cells treated with

267 FK506, Brg1 binding was significantly diminished at all promoters (**Fig. 5A**). A subset of the  
268 myogenic promoters was tested for the binding of Baf170, and Baf250A/Arid1A, which are other  
269 subunits of the mammalian SWI/SNF enzyme complex. The results show that binding of these  
270 other subunits paralleled Brg1 binding in that Cn inhibition blocked interaction of these proteins  
271 to the promoters (**Fig. 5B**). These findings indicate that Cn activity is necessary for the interaction  
272 of mammalian SWI/SNF chromatin remodeling complexes with regulatory sequences of myogenic  
273 genes.

274

#### 275 **Mutation of Brg1 sites of Cn activity prevents its interaction with myogenic gene promoters**

276 In previous work, we showed that PKC $\beta$ -mediated phosphorylation of Brg1 prior to the onset of  
277 differentiation was counteracted by Cn-mediated dephosphorylation of Brg1 immediately after the  
278 onset of differentiation (20). Serine amino acids targeted by PKC $\beta$ /Cn mapped to 5' and 3' of the  
279 Brg1 bromodomain. Mutation of these sites to the phosphomimetic amino acid glutamate (SE)  
280 prevented myogenesis, whereas mutation to the non-phosphorylatable amino acid alanine (SA)  
281 had no effect on differentiation (20). These experiments used primary myoblasts derived from  
282 Brg1-deficient mice that were reconstituted with wildtype (WT)-, SA-, or SE-Brg1. We performed  
283 ChIP experiments in differentiating cells and showed that Cn and Brg1 are bound to myogenic  
284 promoters in myoblasts expressing WT-Brg1 (**Fig. 6A, B**). The SE-Brg1 mutant was incapable of  
285 binding; the repressive phosphorylation of Brg1 caused by PKC $\beta$  is mimicked by the glutamate  
286 substitutions, rendering Cn incapable of activating Brg1. As expected, the SA-Brg1 mutant, which  
287 cannot be phosphorylated at the relevant PKC $\beta$  target amino acids, bound Brg1 and Cn to  
288 myogenic regulatory sequences (**Fig. 6A, B**). These results are consistent with those obtained with

289 the Cn inhibitor, and they reinforce the conclusion that Cn function regulates Brg1 binding to  
290 chromatin at myogenic gene regulatory sequences.

291

### 292 **Cn inhibition does not impact the ability of Cn and Brg1 to interact**

293 We previously showed that Cn and Brg1 can be co-immunoprecipitated from cell lysate of  
294 differentiating cells (20). Inhibition of Cn function with FK506 had no impact on the ability of  
295 these proteins to be isolated in complex with each other (**Fig. 7A**). As a complement to this  
296 experiment, we looked at the interaction of Cn with Brg1 in differentiating myoblasts expressing  
297 WT-, SA-, or SE-Brg1. Cn could interact with WT-, SA-, and SE-Brg1 mutants (**Fig. 7B**), despite  
298 the observation that SE-Brg1 was not competent for interaction with chromatin. These results  
299 indicate that inhibition of Cn function and mutation of the sites of Cn activity on Brg1 do not affect  
300 the interaction that exists between these regulatory proteins. The continued existence of Brg1  
301 protein in the presence of the Cn inhibitor and when Cn-targeted residues are mutated to alanine  
302 or glutamine suggests that the lack of appropriate phosphorylation or dephosphorylation does not  
303 have significant impact on the steady-state levels of Brg1 and therefore is unlikely to be a major  
304 regulator of protein stability.

305

### 306 **Inhibition of calcineurin blocks MyoD binding to regulatory sequences of myogenic genes**

307 Recruitment of MyoD to myogenic promoters prior to the onset of differentiation can be  
308 accomplished by different mechanisms, including gene-specific mechanisms (24, 40, 59). The  
309 continued presence of MyoD on myogenic promoters after the onset of differentiation requires the  
310 Brg1 ATPase (15, 40). We would therefore predict that the inhibition of calcineurin would affect  
311 the interaction of MyoD with myogenic gene regulatory sequences. We assessed MyoD

312 enrichment at the regulatory sequences of tested genes by ChIP. As shown in **Fig. 8**, we observed  
313 enhanced enrichment of MyoD at all analyzed gene promoters in differentiated cells compared to  
314 enrichment prior to or at the onset of differentiation. Recruitment of MyoD at these regulatory  
315 sequences was attenuated by the calcineurin inhibitor. These results support the conclusion that  
316 calcineurin is necessary for the stable binding of MyoD to the myogenic gene regulatory sequences  
317 during differentiation.  
318



## 319 **DISCUSSION**

### 320 **Cn broadly contributes to the activation of the myogenic gene expression program during** 321 **differentiation**

322 The data presented here demonstrate that Cn plays a general role in regulating myogenic gene  
323 expression during the myoblast differentiation. Its mechanism of action is via direct promoter  
324 binding and dephosphorylation of the Brg1 ATPase of the mammalian SWI/SNF chromatin  
325 remodeling enzyme, which regulates the ability of Brg1 and other SWI/SNF enzyme subunits to  
326 stably associated with myogenic promoters during differentiation. Failure of this regulatory step  
327 prevents the required enzymatic remodeling of promoter chromatin structure and subsequent gene  
328 activation during differentiation.

329 The consistent observation of Cn binding to each of the myogenic promoters assayed  
330 suggests that Cn is directly required for the activation of each target gene. The alternative  
331 hypothesis was that Cn required indirectly via a requirement for activation of myogenin, which is  
332 required for activation of myogenic gene products that promote terminal differentiation (60, 61).  
333 In prior work examining other cofactors of myogenic gene expression, we determined that the  
334 SWI/SNF chromatin remodeling enzyme was required for the expression of both myogenin and  
335 subsequent gene expression (57). These new results spatially link Cn and SWI/SNF enzyme  
336 binding to myogenic promoters, which is consistent with Cn function being required for SWI/SNF  
337 enzyme function. In contrast, the Prmt5 arginine methyltransferase is required for myogenin  
338 activation, but ectopic expression of myogenin promoted myogenic gene expression and  
339 differentiation even in the absence of Prmt5 (62), indicating that the requirement for Prmt5 in later  
340 stages of the myogenic gene expression cascade was indirect.

341           The promoter binding capability of Cn is a novel function that is poorly understood. There  
342 is no evidence that Cn contains a recognized DNA binding domain, raising the possibility that it  
343 binds chromatin indirectly. The absence of Cn binding in the presence of the Cn inhibitor suggests  
344 the possibility of auto-dephosphorylation as a necessary pre-requisite. However, prior studies  
345 indicate that autodephosphorylation is slow and that phosphorylated Cn is more efficiently  
346 dephosphorylated by protein phosphatase IIa (63). An alternative hypothesis is that Cn inhibition  
347 alters the structure or function of a Cn binding partner, which directly or indirectly results in loss  
348 of association with chromatin.

349

#### 350 **Regulation of SWI/SNF enzyme by subunit composition and by phosphorylation state**

351           The diversity of mammalian SWI/SNF enzyme complex formation is due in part to the  
352 existence of several subunits that exclusively or predominantly associate with subsets of enzyme  
353 complexes (12, 19). The Baf250A subunit exists in a subset of SWI/SNF complexes known as a  
354 SWI/SNF-A or BAF, which contains several unique subunits not found in the other major  
355 subfamily of SWI/SNF complexes, referred to as SWI/SNF-B or PBAF complexes (64). The  
356 presence of Baf250A at each of the promoters assays suggests that the A/BAF complex may be  
357 the functionally relevant enzyme to promote skeletal muscle differentiation.

358           The literature on which specific enzyme complex(es) act at muscle-specific promoters is  
359 limited. Brg1 has been identified at many myogenic promoters. Interference with Brg1 function  
360 through expression of a dominant negative enzyme, injection of specific antibodies, or via  
361 knockdown blocks myogenic gene expression and differentiation (15, 16, 24, 40, 65), but these  
362 data do not distinguish between different types of SWI/SNF enzymes. The Brm ATPase binds to  
363 the myogenin promoter in isolated mouse myofibers, but not in isolated satellite cells (66),

364 however, knockdown of Brm in cultured myoblasts had limited effect on differentiation-specific  
365 gene expression while instead affecting cell cycle withdrawal (65). Those data indicate that A/BAF  
366 complex function is a necessary pre-requisite for myoblast differentiation. In mouse heart  
367 development, the B/PBAF specific subunits BAF200 and BAF180 are required (67-69), but  
368 Baf250A knockout in mouse neural crest leads to embryonic death due to defective cardiac  
369 development (70). Despite the intriguing ramifications of thousands of different potential  
370 SWI/SNF enzyme compositions, comparison of complexes formed by A/BAF and B/PBAF-  
371 specific subunits in the same cell type showed that genomic binding sites and transcriptionally  
372 responsive genes largely overlapped, leading to the conclusion that the regulation of gene  
373 expression by SWI/SNF enzymes is due to the combined effect of multiple SWI/SNF enzymes  
374 (71). Muscle development and differentiation may similarly rely on multiple SWI/SNF enzyme  
375 assemblies and may not be attributable to one specific enzyme complex.

376 Regulation of SWI/SNF chromatin remodeling enzyme activity, via control of the  
377 phosphorylation state of different proteins within the enzyme complex, is an emerging complexity  
378 that adds to the alarming complexity posed by the thousands of potential combinatorial assemblies  
379 of the enzyme complex from its component subunit proteins (12, 19). Nevertheless, the evidence  
380 for this additional layer of regulation is clear. Amino acids 5' and 3' to the Brg1 bromodomain are  
381 phosphorylated by PKC $\beta$ 1 in proliferating myoblasts and dephosphorylated by Cn after the onset  
382 of differentiation signaling. Failure to remove the phosphorylation prevents remodeling enzyme  
383 function and differentiation, while mutation of these amino acids to prevent phosphorylation  
384 permits function even in the presence of a Cn inhibitor (20). Here we demonstrate the generality  
385 of the requirement for Cn-mediated facilitation of Brg1 function. The PKC $\beta$ 1/Cn axis is joined by  
386 p38 kinase-mediated phosphorylation of the Baf60c subunit that permits assembly of the SWI/SNF

387 enzyme complex on myogenic promoters (24). Most of the SWI/SNF subunits have been  
388 characterized as phosphoproteins (72), suggesting that regulation of activity in response to  
389 differentiation signaling may be influenced by other kinases and phosphatases as well.

390         The consequences of phosphorylation and dephosphorylation of the PKC $\beta$ 1/Cn- targeted  
391 amino acids on Brg1 structure remain to be determined. The fact that Brg1 protein remains present  
392 when the relevant amino acids are mutated or when exposed to Cn inhibitor indicates that the  
393 phosphorylation state of these amino acids does not significantly contribute to Brg1 protein  
394 stability. The failure of other SWI/SNF subunits to remain associated with myogenic gene  
395 chromatin suggests that the phosphorylation state may control Brg1 protein conformation,  
396 interactions with chromatin, interactions with other SWI/SNF enzyme subunits, and/or interactions  
397 with other cofactors that contribute to enzyme complex stability or chromatin binding. Additional  
398 characterization will improve our understanding of Brg1 and SWI/SNF chromatin remodeling  
399 enzyme function in differentiation and may also inform studies on the role of Brg1 in oncogenesis,  
400 where Brg1 can be either mutated or overexpressed without mutation in different types of cancer  
401 (73, 74).

402

403 **ACKNOWLEDGEMENTS**

404 This work was supported by NIH grant GM56244 to ANI, by a Faculty Diversity Scholars  
405 Program award from the University of Massachusetts Medical School to TP-B, and by  
406 KAKENHI (JP17H03608, JP18H04802, JP19H05244, JP18H05527) and JST CREST  
407 JPMJCR16G1 to YO. We also thank the Advanced Computational Scientific Program of the  
408 Research Institute for Information Technology, Kyushu University.

## 409 REFERENCES

- 410 1. **Hernandez-Hernandez JM, Garcia-Gonzalez EG, Brun CE, Rudnicki MA.** 2017.  
411 The myogenic regulatory factors, determinants of muscle development, cell identity and  
412 regeneration. *Semin Cell Dev Biol* **72**:10-18.
- 413 2. **Harada A, Ohkawa Y, Imbalzano AN.** 2017. Temporal regulation of chromatin during  
414 myoblast differentiation. *Semin Cell Dev Biol* **72**:77-86.
- 415 3. **Sartorelli V, Puri PL.** 2018. Shaping Gene Expression by Landscaping Chromatin  
416 Architecture: Lessons from a Master. *Mol Cell* **71**:375-388.
- 417 4. **Wang W, Cote J, Xue Y, Zhou S, Khavari PA, Biggar SR, Muchardt C, Kalpana  
418 GV, Goff SP, Yaniv M, Workman JL, Crabtree GR.** 1996. Purification and  
419 biochemical heterogeneity of the mammalian SWI-SNF complex. *EMBO J* **15**:5370-  
420 5382.
- 421 5. **Imbalzano AN, Kwon H, Green MR, Kingston RE.** 1994. Facilitated binding of  
422 TATA-binding protein to nucleosomal DNA. *Nature* **370**:481-485.
- 423 6. **Kwon H, Imbalzano AN, Khavari PA, Kingston RE, Green MR.** 1994. Nucleosome  
424 disruption and enhancement of activator binding by a human SW1/SNF complex. *Nature*  
425 **370**:477-481.
- 426 7. **Seeber A, Hauer M, Gasser SM.** 2013. Nucleosome remodelers in double-strand break  
427 repair. *Curr Opin Genet Dev* **23**:174-184.
- 428 8. **Clapier CR, Cairns BR.** 2014. Chromatin remodeling complexes, In *Fundamentals of*  
429 *Chromatin*, vol 9781461486244, Springer.
- 430 9. **Lorch Y, Kornberg RD.** 2015. Chromatin-remodeling and the initiation of transcription.  
431 *Q Rev Biophys* **48**:465-470.
- 432 10. **Clapier CR, Iwasa J, Cairns BR, Peterson CL.** 2017. Mechanisms of action and  
433 regulation of ATP-dependent chromatin-remodelling complexes. *Nat Rev Mol Cell Biol*  
434 **18**:407-422.
- 435 11. **Romero OA, Sanchez-Cespedes M.** 2014. The SWI/SNF genetic blockade: effects in  
436 cell differentiation, cancer and developmental diseases. *Oncogene* **33**:2681-2689.
- 437 12. **Wu JI.** 2012. Diverse functions of ATP-dependent chromatin remodeling complexes in  
438 development and cancer. *Acta Biochim Biophys Sin (Shanghai)* **44**:54-69.
- 439 13. **Ho L, Crabtree GR.** 2010. Chromatin remodelling during development. *Nature*  
440 **463**:474-484.
- 441 14. **de la Serna IL, Ohkawa Y, Imbalzano AN.** 2006. Chromatin remodelling in  
442 mammalian differentiation: lessons from ATP-dependent remodellers. *Nat Rev Genet*  
443 **7**:461-473.
- 444 15. **Simone C, Forcales SV, Hill DA, Imbalzano AN, Latella L, Puri PL.** 2004. p38  
445 pathway targets SWI-SNF chromatin-remodeling complex to muscle-specific loci. *Nat*  
446 *Genet* **36**:738-743.
- 447 16. **de la Serna IL, Carlson KA, Imbalzano AN.** 2001. Mammalian SWI/SNF complexes  
448 promote MyoD-mediated muscle differentiation. *Nat Genet* **27**:187-190.
- 449 17. **Khavari PA, Peterson CL, Tamkun JW, Mendel DB, Crabtree GR.** 1993. BRG1  
450 contains a conserved domain of the SWI2/SNF2 family necessary for normal mitotic  
451 growth and transcription. *Nature* **366**:170-174.

- 452 18. **Muchardt C, Yaniv M.** 1993. A human homologue of *Saccharomyces cerevisiae*  
453 SNF2/SWI2 and *Drosophila* brm genes potentiates transcriptional activation by the  
454 glucocorticoid receptor. *EMBO J* **12**:4279-4290.
- 455 19. **Hargreaves DC, Crabtree GR.** 2011. ATP-dependent chromatin remodeling: genetics,  
456 genomics and mechanisms. *Cell Res* **21**:396-420.
- 457 20. **Nasipak BT, Padilla-Benavides T, Green KM, Leszyk JD, Mao W, Konda S, Sif S,**  
458 **Shaffer SA, Ohkawa Y, Imbalzano AN.** 2015. Opposing calcium-dependent signalling  
459 pathways control skeletal muscle differentiation by regulating a chromatin remodelling  
460 enzyme. *Nat Commun* **6**:7441.
- 461 21. **Padilla-Benavides T, Nasipak BT, Paskavitz AL, Haokip DT, Schnabl JM,**  
462 **Nickerson JA, Imbalzano AN.** 2017. Casein kinase 2-mediated phosphorylation of  
463 Brahma-related gene 1 controls myoblast proliferation and contributes to SWI/SNF  
464 complex composition. *J Biol Chem* **292**:18592-18607.
- 465 22. **Wang L, Zhao Z, Meyer MB, Saha S, Yu M, Guo A, Wisinski KB, Huang W, Cai**  
466 **W, Pike JW, Yuan M, Ahlquist P, Xu W.** 2016. CARM1 Methylates Chromatin  
467 Remodeling Factor BAF155 to Enhance Tumor Progression and Metastasis. *Cancer Cell*  
468 **30**:179-180.
- 469 23. **Cui H, Schlesinger J, Schoenhals S, Tonjes M, Dunkel I, Meierhofer D, Cano E,**  
470 **Schulz K, Berger MF, Haack T, Abdelilah-Seyfried S, Bulyk ML, Sauer S, Sperling**  
471 **SR.** 2016. Phosphorylation of the chromatin remodeling factor DPF3a induces cardiac  
472 hypertrophy through releasing HEY repressors from DNA. *Nucleic Acids Res* **44**:2538-  
473 2553.
- 474 24. **Forcales SV, Albin S, Giordani L, Malecova B, Cignolo L, Chernov A, Coutinho P,**  
475 **Saccone V, Consalvi S, Williams R, Wang K, Wu Z, Baranovskaya S, Miller A,**  
476 **Dilworth FJ, Puri PL.** 2012. Signal-dependent incorporation of MyoD-BAF60c into  
477 Brg1-based SWI/SNF chromatin-remodelling complex. *EMBO J* **31**:301-316.
- 478 25. **Stewart AA, Ingebritsen TS, Manalan A, Klee CB, Cohen P.** 1982. Discovery of a  
479 Ca<sup>2+</sup>- and calmodulin-dependent protein phosphatase: probable identity with calcineurin  
480 (CaM-BP80). *FEBS Lett* **137**:80-84.
- 481 26. **Rusnak F, Mertz P.** 2000. Calcineurin: form and function. *Physiol Rev* **80**:1483-1521.
- 482 27. **Manalan AS, Krinks MH, Klee CB.** 1984. Calcineurin: a member of a family of  
483 calmodulin-stimulated protein phosphatases. *Proc Soc Exp Biol Med* **177**:12-16.
- 484 28. **Liu J, Farmer JD, Jr., Lane WS, Friedman J, Weissman I, Schreiber SL.** 1991.  
485 Calcineurin is a common target of cyclophilin-cyclosporin A and FKBP-FK506  
486 complexes. *Cell* **66**:807-815.
- 487 29. **Flanagan PM, Kelleher RJ, 3rd, Sayre MH, Tschochner H, Kornberg RD.** 1991. A  
488 mediator required for activation of RNA polymerase II transcription in vitro. *Nature*  
489 **350**:436-438.
- 490 30. **Shaw KT, Ho AM, Raghavan A, Kim J, Jain J, Park J, Sharma S, Rao A, Hogan**  
491 **PG.** 1995. Immunosuppressive drugs prevent a rapid dephosphorylation of transcription  
492 factor NFAT1 in stimulated immune cells. *Proc Natl Acad Sci U S A* **92**:11205-11209.
- 493 31. **Ruff VA, Leach KL.** 1995. Direct demonstration of NFATp dephosphorylation and  
494 nuclear localization in activated HT-2 cells using a specific NFATp polyclonal antibody.  
495 *J Biol Chem* **270**:22602-22607.

- 496 32. **Chin ER, Olson EN, Richardson JA, Yang Q, Humphries C, Shelton JM, Wu H,**  
497 **Zhu W, Bassel-Duby R, Williams RS.** 1998. A calcineurin-dependent transcriptional  
498 pathway controls skeletal muscle fiber type. *Genes Dev* **12**:2499-2509.
- 499 33. **Schiaffino S, Sandri M, Murgia M.** 2007. Activity-dependent signaling pathways  
500 controlling muscle diversity and plasticity. *Physiology (Bethesda)* **22**:269-278.
- 501 34. **Dunn SE, Burns JL, Michel RN.** 1999. Calcineurin is required for skeletal muscle  
502 hypertrophy. *J Biol Chem* **274**:21908-21912.
- 503 35. **Horsley V, Friday BB, Matteson S, Kegley KM, Gephart J, Pavlath GK.** 2001.  
504 Regulation of the growth of multinucleated muscle cells by an NFATC2-dependent  
505 pathway. *J Cell Biol* **153**:329-338.
- 506 36. **Ravel-Chapuis A, Belanger G, Cote J, Michel RN, Jasmin BJ.** 2017. Misregulation of  
507 calcium-handling proteins promotes hyperactivation of calcineurin-NFAT signaling in  
508 skeletal muscle of DM1 mice. *Hum Mol Genet* **26**:2192-2206.
- 509 37. **Friday BB, Horsley V, Pavlath GK.** 2000. Calcineurin activity is required for the  
510 initiation of skeletal muscle differentiation. *J Cell Biol* **149**:657-666.
- 511 38. **Friday BB, Mitchell PO, Kegley KM, Pavlath GK.** 2003. Calcineurin initiates skeletal  
512 muscle differentiation by activating MEF2 and MyoD. *Differentiation* **71**:217-227.
- 513 39. **de La Serna IL, Carlson KA, Hill DA, Guidi CJ, Stephenson RO, Sif S, Kingston**  
514 **RE, Imbalzano AN.** 2000. Mammalian SWI-SNF complexes contribute to activation of  
515 the hsp70 gene. *Mol Cell Biol* **20**:2839-2851.
- 516 40. **de la Serna IL, Ohkawa Y, Berkes CA, Bergstrom DA, Dacwag CS, Tapscott SJ,**  
517 **Imbalzano AN.** 2005. MyoD targets chromatin remodeling complexes to the myogenin  
518 locus prior to forming a stable DNA-bound complex. *Mol Cell Biol* **25**:3997-4009.
- 519 41. **Livak KJ, Schmittgen TD.** 2001. Analysis of relative gene expression data using real-  
520 time quantitative PCR and the 2(-Delta Delta C(T)) Method. *Methods* **25**:402-408.
- 521 42. **Hashimshony T, Senderovich N, Avital G, Klochendler A, de Leeuw Y, Anavy L,**  
522 **Gennert D, Li S, Livak KJ, Rozenblatt-Rosen O, Dor Y, Regev A, Yanai I.** 2016.  
523 CEL-Seq2: sensitive highly-multiplexed single-cell RNA-Seq. *Genome Biol* **17**:77.
- 524 43. **Kim D, Langmead B, Salzberg SL.** 2015. HISAT: a fast spliced aligner with low  
525 memory requirements. *Nat Methods* **12**:357-360.
- 526 44. **Anders S, Pyl PT, Huber W.** 2015. HTSeq--a Python framework to work with high-  
527 throughput sequencing data. *Bioinformatics* **31**:166-169.
- 528 45. **Grun D, Kester L, van Oudenaarden A.** 2014. Validation of noise models for single-  
529 cell transcriptomics. *Nat Methods* **11**:637-640.
- 530 46. **Love MI, Huber W, Anders S.** 2014. Moderated estimation of fold change and  
531 dispersion for RNA-seq data with DESeq2. *Genome Biol* **15**:550.
- 532 47. **Yu G, Wang LG, Han Y, He QY.** 2012. clusterProfiler: an R package for comparing  
533 biological themes among gene clusters. *OMICS* **16**:284-287.
- 534 48. **Hernandez-Hernandez JM, Mallappa C, Nasipak BT, Oesterreich S, Imbalzano AN.**  
535 2013. The Scaffold attachment factor b1 (Safb1) regulates myogenic differentiation by  
536 facilitating the transition of myogenic gene chromatin from a repressed to an activated  
537 state. *Nucleic Acids Res* **41**:5704-5716.
- 538 49. **Gunning P, Hardeman E, Wade R, Ponte P, Bains W, Blau HM, Kedes L.** 1987.  
539 Differential patterns of transcript accumulation during human myogenesis. *Mol Cell Biol*  
540 **7**:4100-4114.



- 541 50. **Bergstrom DA, Penn BH, Strand A, Perry RL, Rudnicki MA, Tapscott SJ.** 2002.  
542 Promoter-specific regulation of MyoD binding and signal transduction cooperate to  
543 pattern gene expression. *Mol Cell* **9**:587-600.
- 544 51. **Lin Z, Lu MH, Schultheiss T, Choi J, Holtzer S, DiLullo C, Fischman DA, Holtzer**  
545 **H.** 1994. Sequential appearance of muscle-specific proteins in myoblasts as a function of  
546 time after cell division: evidence for a conserved myoblast differentiation program in  
547 skeletal muscle. *Cell Motil Cytoskeleton* **29**:1-19.
- 548 52. **Boyle WJ, Simonet WS, Lacey DL.** 2003. Osteoclast differentiation and activation.  
549 *Nature* **423**:337-342.
- 550 53. **Wu H, Peisley A, Graef IA, Crabtree GR.** 2007. NFAT signaling and the invention of  
551 vertebrates. *Trends Cell Biol* **17**:251-260.
- 552 54. **Cheng M, Nguyen MH, Fantuzzi G, Koh TJ.** 2008. Endogenous interferon-gamma is  
553 required for efficient skeletal muscle regeneration. *Am J Physiol Cell Physiol*  
554 **294**:C1183-1191.
- 555 55. **Jesse TL, LaChance R, Iademarco MF, Dean DC.** 1998. Interferon regulatory factor-2  
556 is a transcriptional activator in muscle where It regulates expression of vascular cell  
557 adhesion molecule-1. *J Cell Biol* **140**:1265-1276.
- 558 56. **Deng S, Azevedo M, Baylies M.** 2017. Acting on identity: Myoblast fusion and the  
559 formation of the syncytial muscle fiber. *Semin Cell Dev Biol* **72**:45-55.
- 560 57. **Ohkawa Y, Marfella CG, Imbalzano AN.** 2006. Skeletal muscle specification by  
561 myogenin and Mef2D via the SWI/SNF ATPase Brg1. *EMBO J* **25**:490-501.
- 562 58. **Ohkawa Y, Yoshimura S, Higashi C, Marfella CG, Dacwag CS, Tachibana T,**  
563 **Imbalzano AN.** 2007. Myogenin and the SWI/SNF ATPase Brg1 maintain myogenic  
564 gene expression at different stages of skeletal myogenesis. *J Biol Chem* **282**:6564-6570.
- 565 59. **Cao Y, Kumar RM, Penn BH, Berkes CA, Kooperberg C, Boyer LA, Young RA,**  
566 **Tapscott SJ.** 2006. Global and gene-specific analyses show distinct roles for Myod and  
567 Myog at a common set of promoters. *EMBO J* **25**:502-511.
- 568 60. **Hasty P, Bradley A, Morris JH, Edmondson DG, Venuti JM, Olson EN, Klein WH.**  
569 1993. Muscle deficiency and neonatal death in mice with a targeted mutation in the  
570 myogenin gene. *Nature* **364**:501-506.
- 571 61. **Nabeshima Y, Hanaoka K, Hayasaka M, Esumi E, Li S, Nonaka I, Nabeshima Y.**  
572 1993. Myogenin gene disruption results in perinatal lethality because of severe muscle  
573 defect. *Nature* **364**:532-535.
- 574 62. **Dacwag CS, Bedford MT, Sif S, Imbalzano AN.** 2009. Distinct protein arginine  
575 methyltransferases promote ATP-dependent chromatin remodeling function at different  
576 stages of skeletal muscle differentiation. *Mol Cell Biol* **29**:1909-1921.
- 577 63. **Hashimoto Y, King MM, Soderling TR.** 1988. Regulatory interactions of calmodulin-  
578 binding proteins: phosphorylation of calcineurin by autophosphorylated  
579 Ca<sup>2+</sup>/calmodulin-dependent protein kinase II. *Proc Natl Acad Sci U S A* **85**:7001-7005.
- 580 64. **Nie Z, Xue Y, Yang D, Zhou S, Deroo BJ, Archer TK, Wang W.** 2000. A specificity  
581 and targeting subunit of a human SWI/SNF family-related chromatin-remodeling  
582 complex. *Mol Cell Biol* **20**:8879-8888.
- 583 65. **Albini S, Coutinho Toto P, Dall'Agnese A, Malecova B, Cenciarelli C, Felsani A,**  
584 **Caruso M, Bultman SJ, Puri PL.** 2015. Brahma is required for cell cycle arrest and late  
585 muscle gene expression during skeletal myogenesis. *EMBO Rep* **16**:1037-1050.

- 586 66. **Ohkawa Y, Mallappa C, Vallaster CS, Imbalzano AN.** 2012. Isolation of nuclei from  
587 skeletal muscle satellite cells and myofibers for use in chromatin immunoprecipitation  
588 assays. *Methods Mol Biol* **798**:517-530.
- 589 67. **Wang Z, Zhai W, Richardson JA, Olson EN, Meneses JJ, Firpo MT, Kang C,**  
590 **Skarnes WC, Tjian R.** 2004. Polybromo protein BAF180 functions in mammalian  
591 cardiac chamber maturation. *Genes Dev* **18**:3106-3116.
- 592 68. **Huang X, Gao X, Diaz-Trelles R, Ruiz-Lozano P, Wang Z.** 2008. Coronary  
593 development is regulated by ATP-dependent SWI/SNF chromatin remodeling component  
594 BAF180. *Dev Biol* **319**:258-266.
- 595 69. **He L, Tian X, Zhang H, Hu T, Huang X, Zhang L, Wang Z, Zhou B.** 2014. BAF200  
596 is required for heart morphogenesis and coronary artery development. *PLoS One*  
597 **9**:e109493.
- 598 70. **Chandler RL, Magnuson T.** 2016. The SWI/SNF BAF-A complex is essential for  
599 neural crest development. *Dev Biol* **411**:15-24.
- 600 71. **Raab JR, Resnick S, Magnuson T.** 2015. Genome-Wide Transcriptional Regulation  
601 Mediated by Biochemically Distinct SWI/SNF Complexes. *PLoS Genet* **11**:e1005748.
- 602 72. **Dallas PB, Yaciuk P, Moran E.** 1997. Characterization of monoclonal antibodies raised  
603 against p300: both p300 and CBP are present in intracellular TBP complexes. *J Virol*  
604 **71**:1726-1731.
- 605 73. **Hodges C, Kirkland JG, Crabtree GR.** 2016. The Many Roles of BAF (mSWI/SNF)  
606 and PBAF Complexes in Cancer. *Cold Spring Harb Perspect Med* **6**.
- 607 74. **Wu Q, Lian JB, Stein JL, Stein GS, Nickerson JA, Imbalzano AN.** 2017. The BRG1  
608 ATPase of human SWI/SNF chromatin remodeling enzymes as a driver of cancer.  
609 *Epigenomics* **9**:919-931.
- 610

**Figure 1**

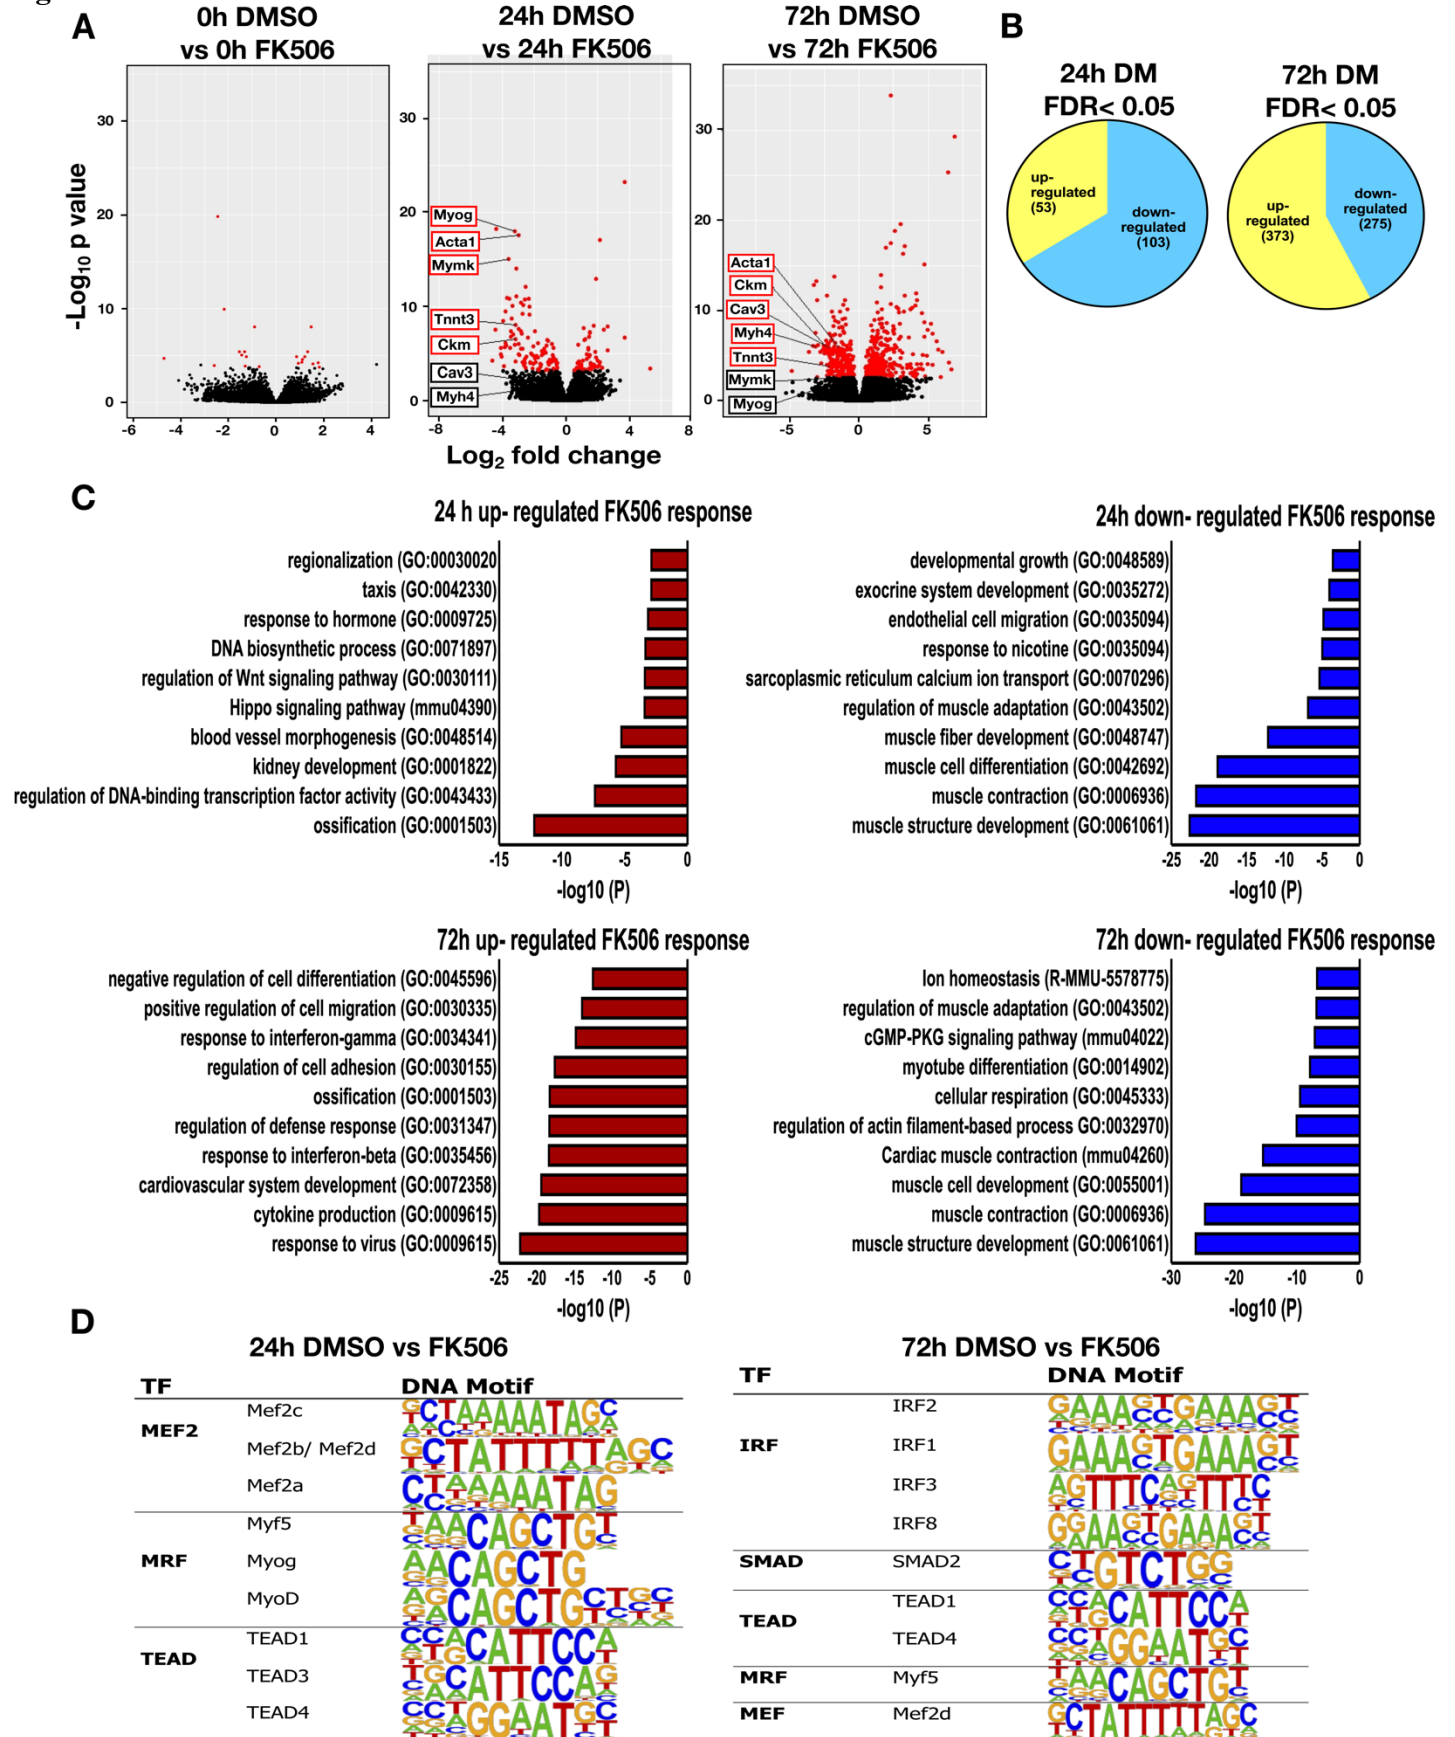

**Figure 1: Differential gene expression in myoblasts treated with Cn inhibitor.** (A) Volcano plots displaying differentially expressed genes between control (DMSO) treated and Cn inhibitor (FK506) treated differentiated C2C12 cells. The y-axis corresponds to the mean expression value of  $\log_{10}$  (p-value), and the x-axis displays the  $\log_2$  fold change value. The red dots represent the up- and down-regulated transcripts between DMSO- and FK506-treated samples (False Discovery Rate (FDR) $<0.05$ ). The black dots represent the expression of transcripts that did not reach statistical significance (FDR $>0.05$ ). (B) A Venn diagram displaying the number of genes up- and down-regulated by FK506 treatment at 24 and 72h post-differentiation. (C) Gene ontology analyses on genes differentially expressed by FK506 treatment for 24 and 72h post-differentiation. (D) Transcription factor binding motifs identified within 1kb upstream of the TSS of genes differentially expressed by FK506 treatment in cells differentiated for 24 and 72h.

**Figure 2**

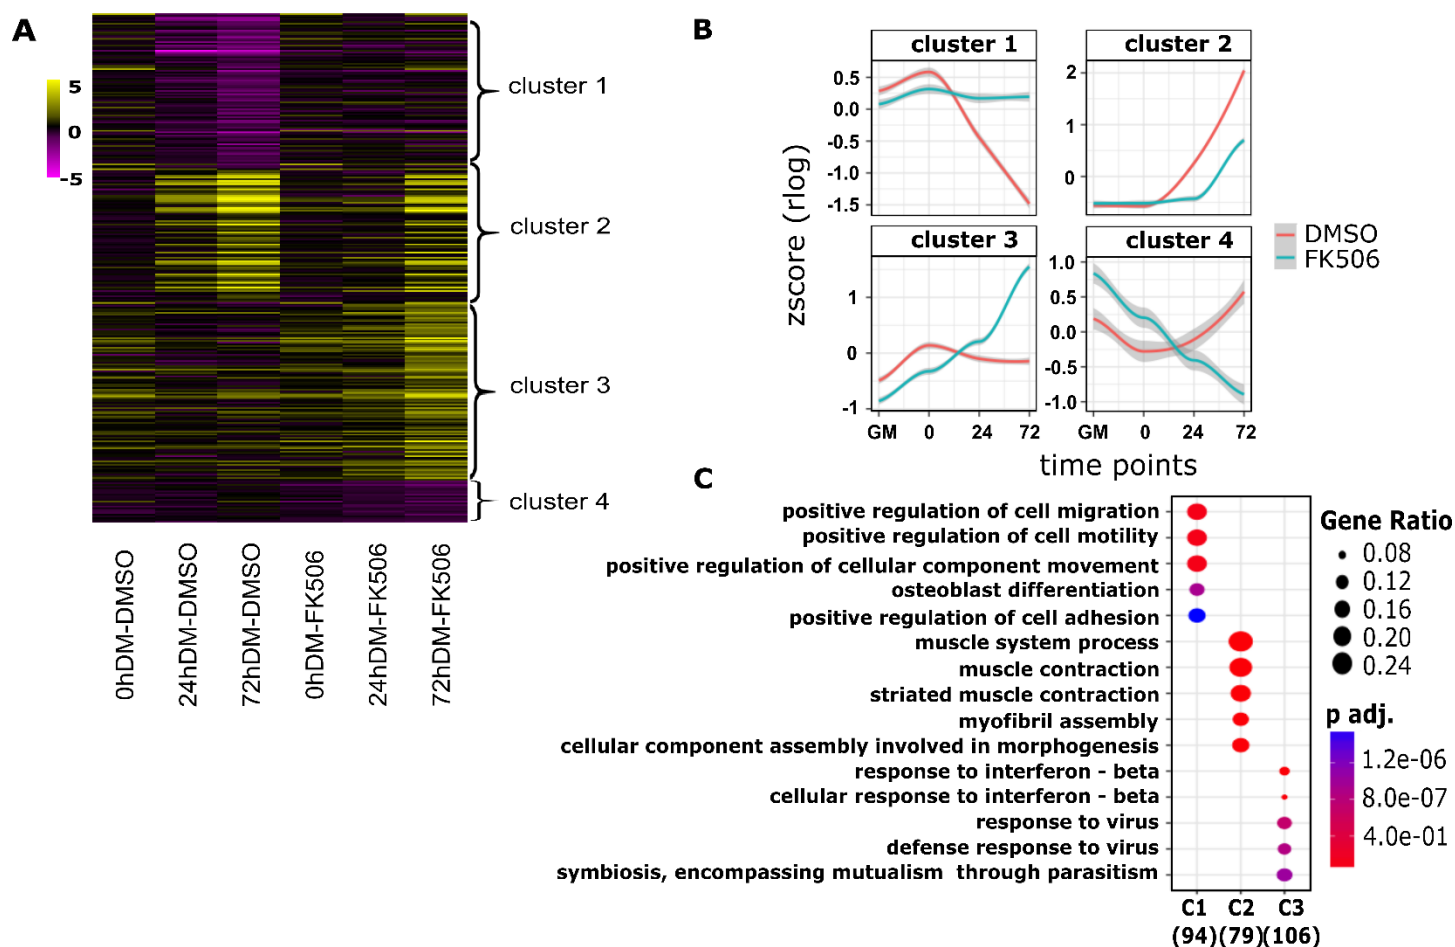

**Figure 2: Cluster analysis of differentially expressed genes at three differentiation time points in myoblasts treated with Cn inhibitor. (A)** The heat map comparing differential expression of 308 FK506 treatment-specific genes, categorized in four different clusters. Each column represents an experimental sample (times 0, 24 and 72h in differentiation medium (DM)) compared to the proliferating myoblast sample cultured in growth media (GM). Each row represents a specific gene. The colors range from yellow (high expression) to magenta (low expression) and represent the relative expression level value  $\log_2$  ratios. **(B)** Kinetic expression patterns of the four clusters of genes. **(C)** Gene ontology analysis of differentially expressed genes within clusters 1-3 (C1, C2, C3) identified the top enriched GO terms with the corresponding enrichment  $p$  values and gene ratio.

Figure 3

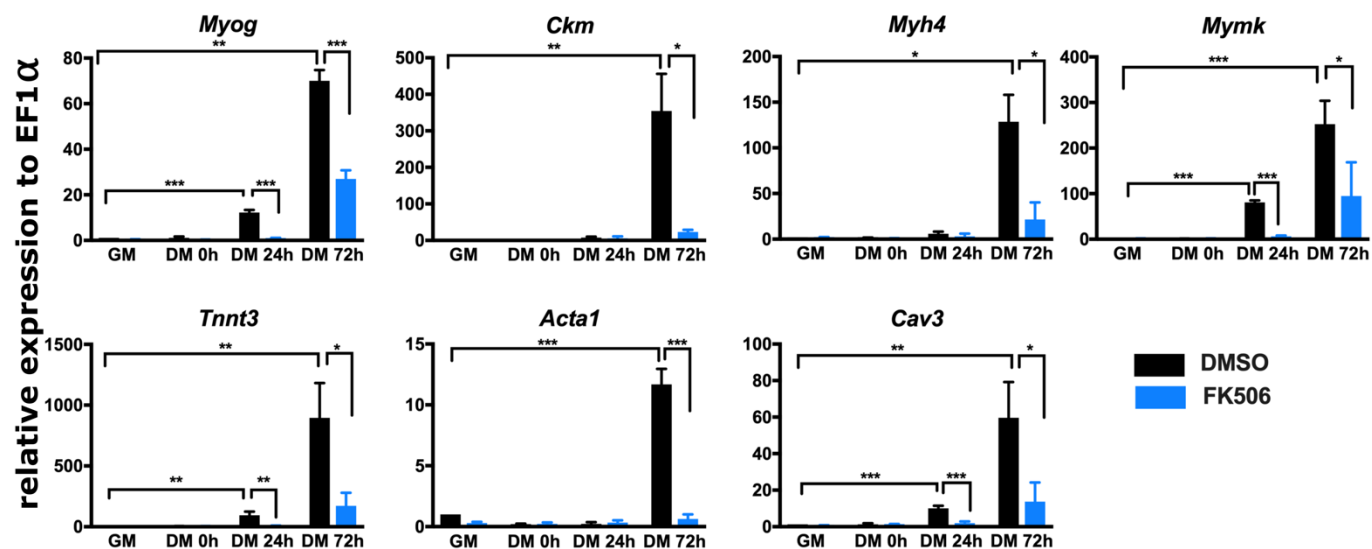

**Figure 3: Cn regulates the expression of myogenic genes during myoblast differentiation.** Real-time RT-PCR showed that expression of *Myog*, *Ckm*, *Myh4*, *Mymk*, *Tnnt3*, *Acta 1*, and *Cav 3* is down-regulated in FK506-treated C2C12 cells. GM, proliferating cells in growth medium. DM, differentiation medium for the indicated time in hours (h). Data are the average of three or more independent samples performed in duplicate and are presented as the mean +/- SD. Expression in DMSO-treated GM samples were set to 1 and other values are relative to that sample. \*  $p \leq 0.05$ , \*\*  $p \leq 0.001$ , \*\*\*  $p \leq 0.0001$  vs. GM or vehicle by Student's t-test.

Figure 4

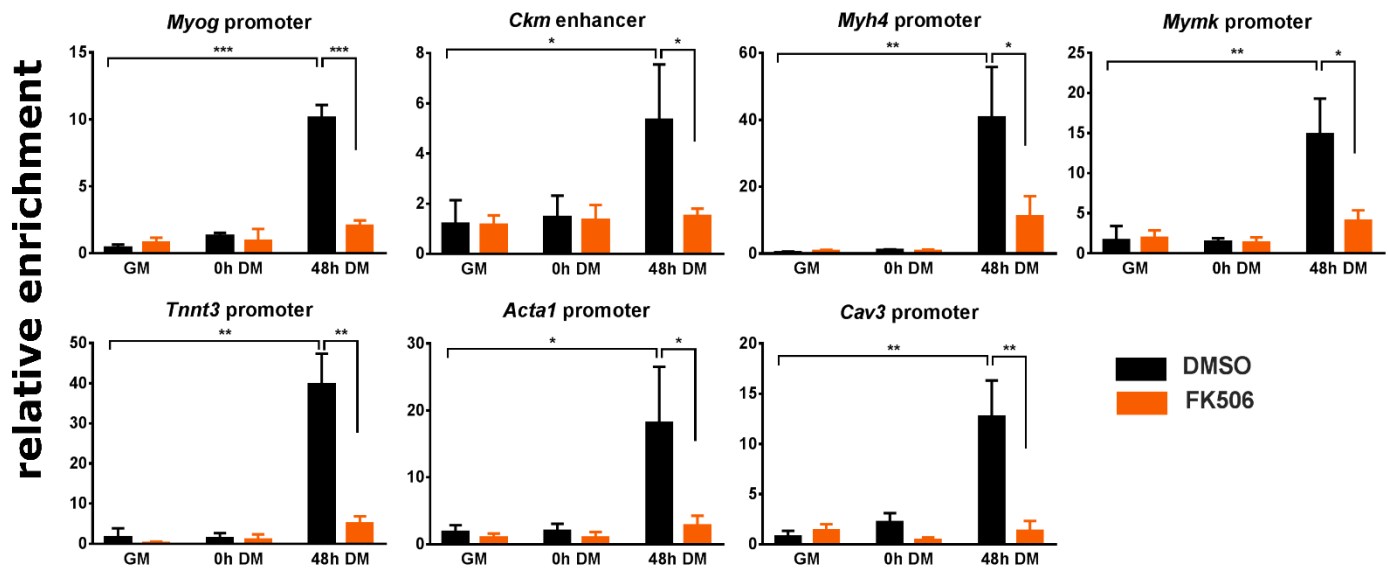

**Figure 4: Cn binds to E-box containing regulatory sequences of myogenic genes during myoblast differentiation. Cn binding is reduced by FK506 treatment.** ChIP assays were performed for Cn binding in C2C12 cells. GM, proliferating cells in growth medium. DM, differentiation medium for the indicated time in hours (h). Relative enrichment was defined as the ratio of amplification of the PCR product normalized to control IgG and is shown relative to amplification of a non-specific control promoter region. The data are average of at least 3 independent experiments performed in triplicate +/- SD. \*  $p \leq 0.05$ , \*\*  $p \leq 0.01$ , \*\*\*  $p \leq 0.001$  vs. GM or vehicle by Student's t-test.

Figure 5

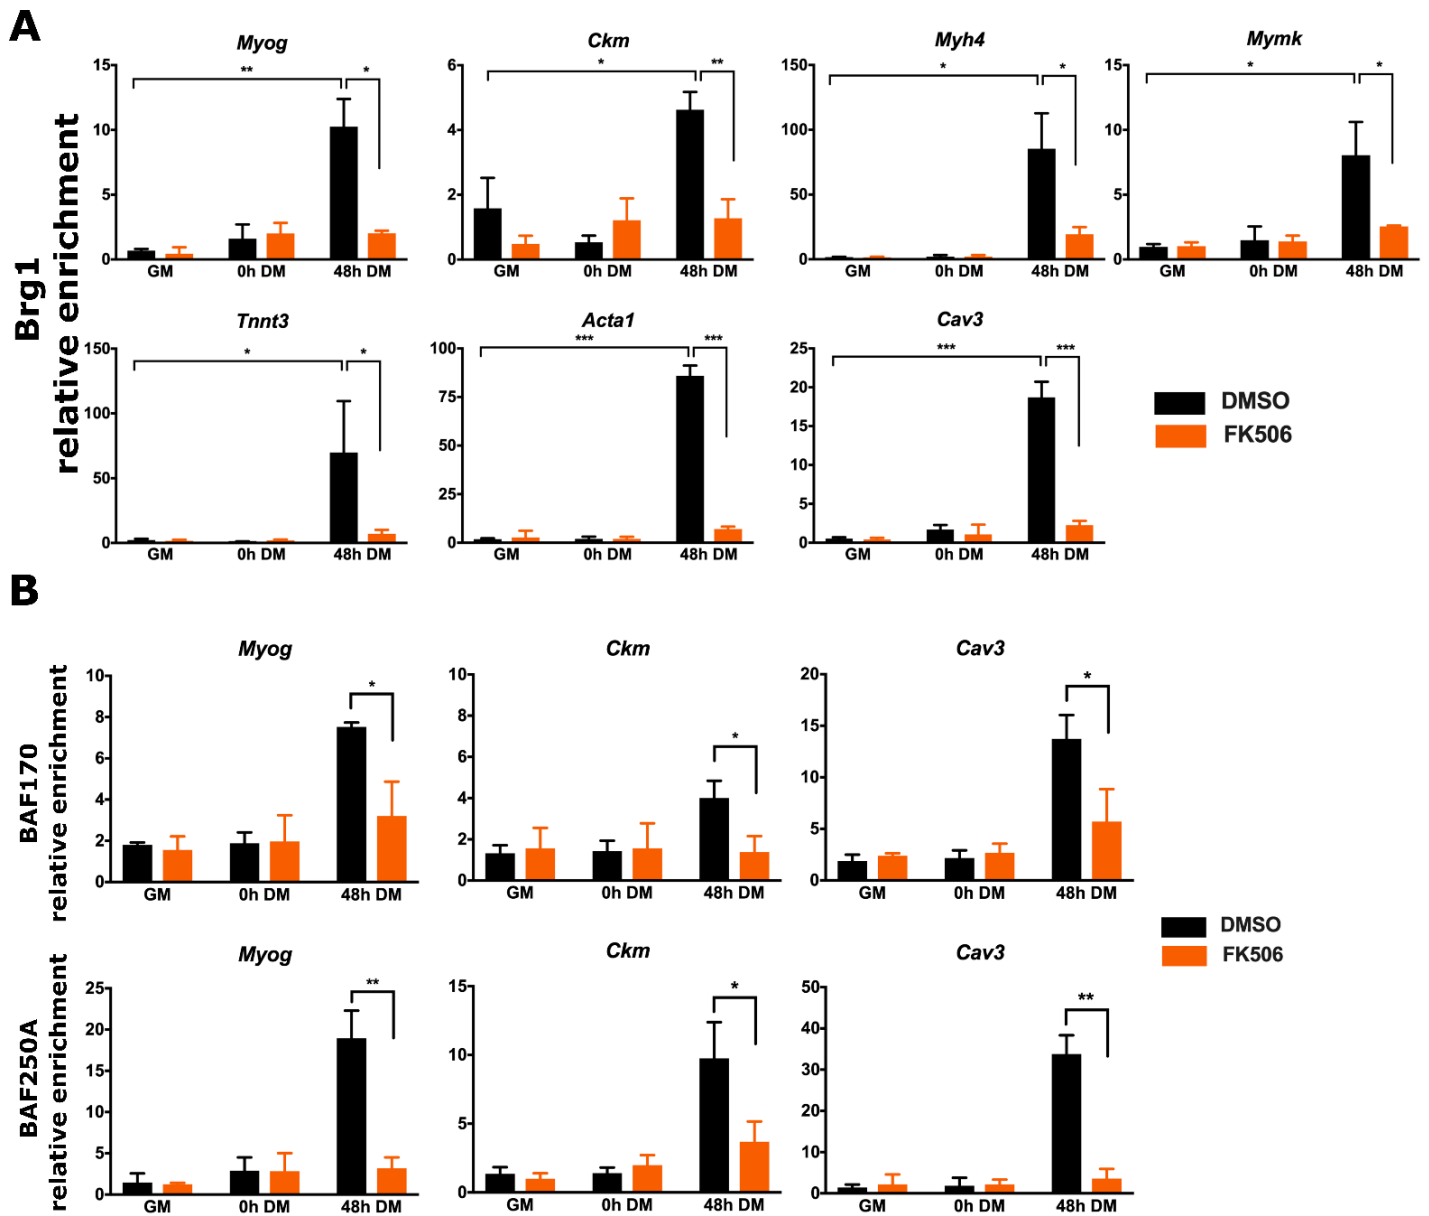

**Figure 5: Cn inhibition reduces binding of the SWI/SNF subunits Brg1 (A), Baf170 and Baf250A (B) to E-box containing regulatory sequences of myogenic genes during myoblast differentiation.** ChIP assays were performed for Brg1, Baf170 and Baf250A binding in C2C12 cells. GM, proliferating cells in growth medium. DM, differentiation medium for the indicated time in hours (h). Relative enrichment was defined as the ratio of amplification of the PCR product normalized to control IgG and is shown relative to amplification of a non-specific control promoter region. The data are average of at least 3 independent experiments performed in triplicate +/- SD. \*  $p \leq 0.05$ , \*\*  $p \leq 0.01$ , \*\*\*  $p \leq 0.001$  vs. GM or vehicle by Student's t-test.



## Figure 6

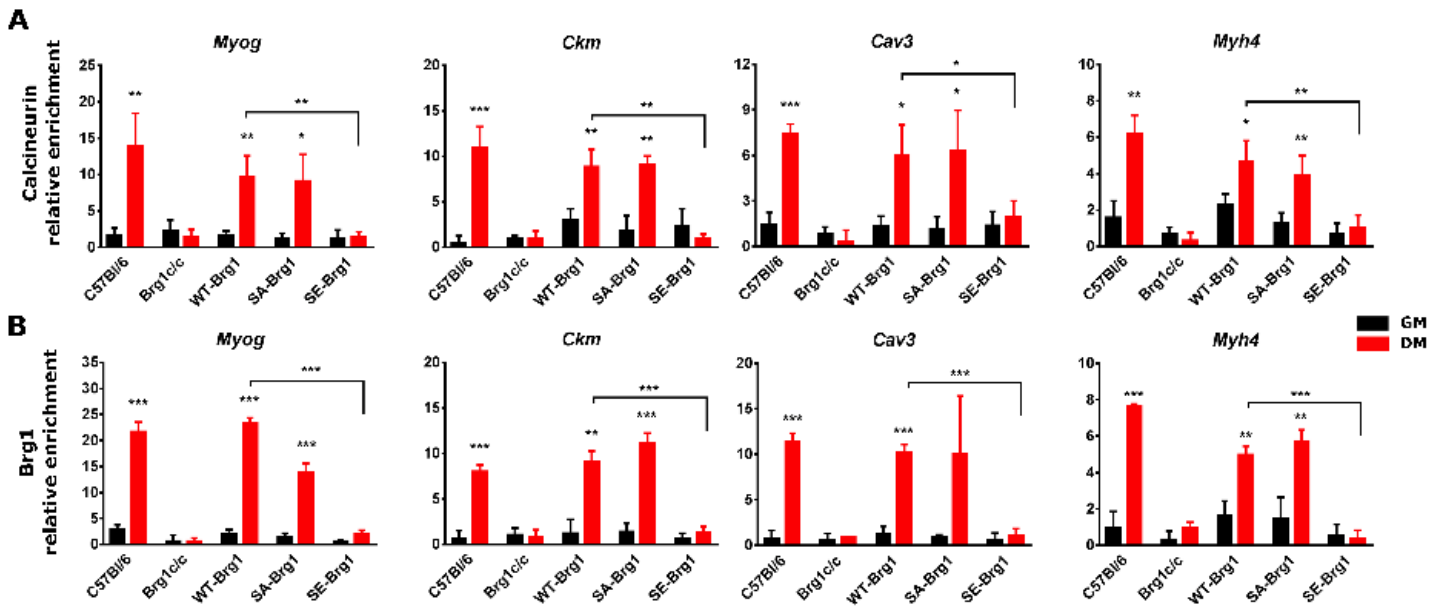

**Figure 6: Phosphomimetic mutation of Brg1 amino acids that are dephosphorylated by Cn reduces Cn and Brg1 binding to myogenic promoters in differentiating myoblasts.** ChIP assays were performed for Cn or Brg1 binding in primary mouse myoblasts (C57Bl/6), in primary mouse myoblasts deleted for the gene encoding Brg1 (Brg1c/c), or in primary mouse myoblasts deleted for the gene encoding Brg1 that are expressing a wildtype (WT-Brg1), Brg1 containing a non-phosphorylatable amino acid at Cn-targeted sites (SA-Brg1), or Brg1 containing a phosphomimetic amino acid at Cn-targeted sites (SE-Brg1). Samples were collected from proliferating cells in growth medium (GM) or at 24h post-differentiation (DM). Relative enrichment was defined as the ratio of amplification of the PCR product normalized to control IgG and is shown relative to amplification of a non-specific control promoter region. The data are average of 3 independent experiments performed in triplicate +/- SD. \*  $p \leq 0.05$ , \*\*  $p \leq 0.01$ , \*\*\*  $p \leq 0.001$  by Student's t-test.

## Figure 7

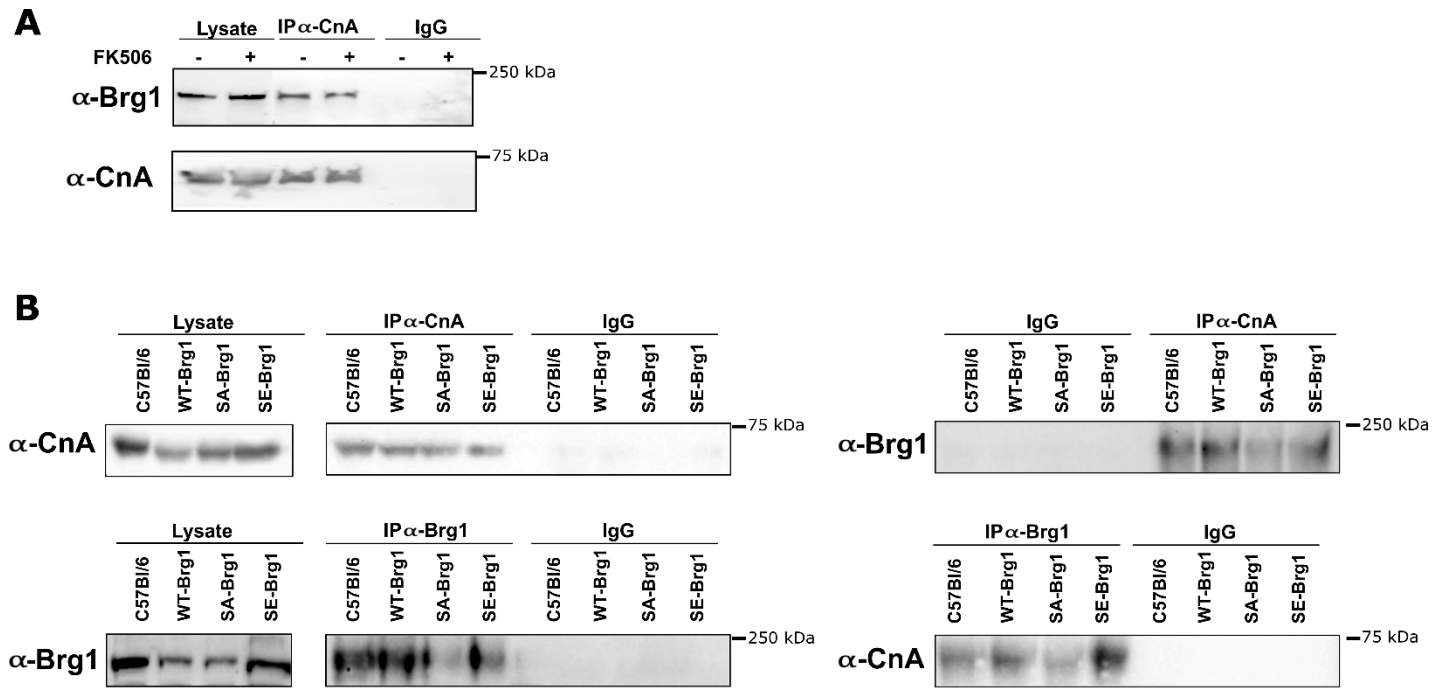

**Figure 7: Interaction between Cn and Brg1 is not affected by Cn inhibition (A) or mutation of Brg1 amino acids that are targeted by Cn (B).** (A) Co-immunoprecipitation of Cn and Brg1 from cell lysates from differentiated C2C12 cells treated with FK506. (B) Co-immunoprecipitation of Cn and Brg1 from cell lysates from 24h differentiated primary C57Bl/6 myoblasts and from primary mouse myoblasts deleted for the gene encoding Brg1 that are expressing a wildtype (WT-Brg1), Brg1 containing non-phosphorylatable amino acids at Cn-targeted sites (SA-Brg1), or Brg1 containing phosphomimetic amino acids at Cn-targeted sites (SE-Brg1). Cell lysate from each IP (2.5% of input) served as a loading controls. The experiments were performed 3 times and representative gels are shown.

Figure 8

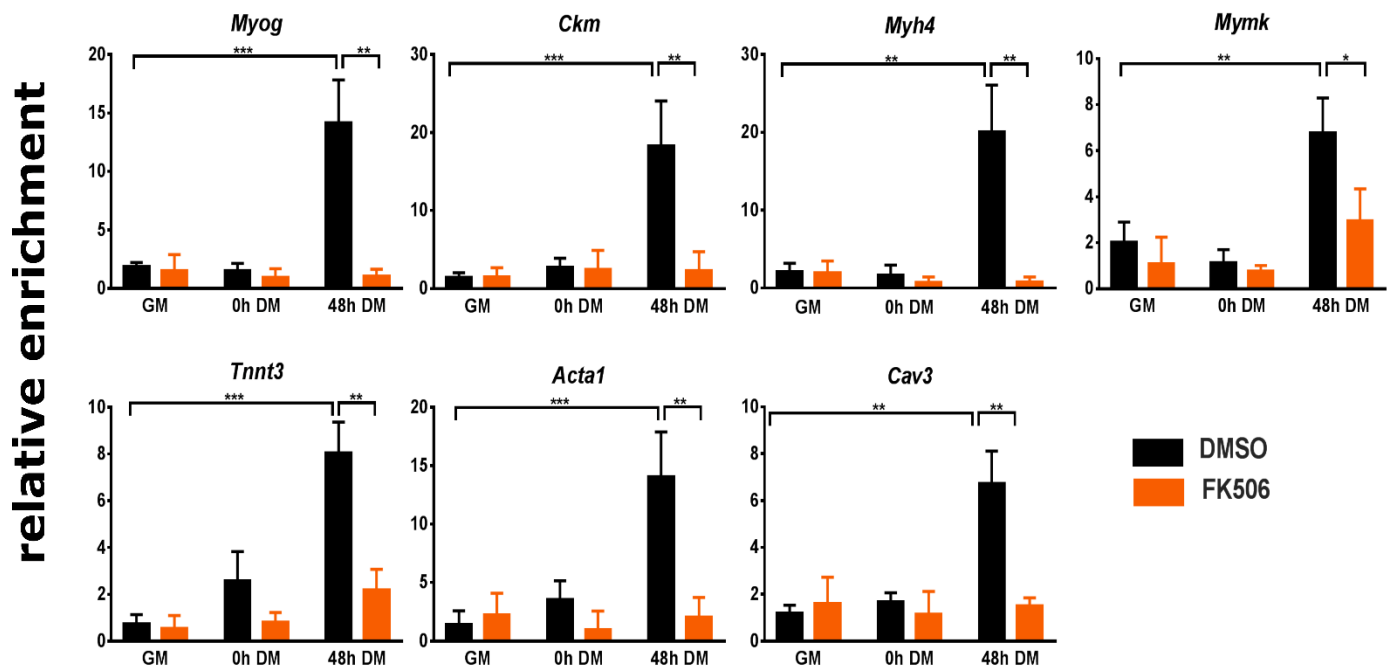

**Figure 8: Inhibition of Cn reduced MyoD binding to regulatory sequences of myogenic genes during myoblast differentiation.** ChIP assays were performed for MyoD binding in C2C12 cells. GM, proliferating cells in growth medium. DM, differentiation medium for the indicated time in hours (h). Relative enrichment was defined as the ratio of amplification of the PCR product normalized to control IgG and is shown relative to amplification of a non-specific control promoter region. The data are average of at least 3 independent experiments performed in triplicate +/- SD. \*  $p \leq 0.05$ ; \*\*  $p \leq 0.01$ , \*\*\*  $p \leq 0.001$  vs. GM or vehicle by Student's t-test.

## SUPPLEMENTARY DATA

### Supplementary Table S1

Sequences of forward and reverse primers used in Q-PCR

| Gene          | Primer sequences                                                                      |
|---------------|---------------------------------------------------------------------------------------|
| <i>Acta1</i>  | Fr 5'-CTTCCTTTATCGGTATGGAGTCTGCGG-3'<br>Rv 5'-GGGGGGCGATGATCTTCATG-3'                 |
| <i>Cav3</i>   | Fr: 5'-TCAATGAGGACATTGTGAAGGTAGA-3'<br>Rv: 5'-CAGTGTAGACAACAGGCCGGT-3'                |
| <i>Ckm</i>    | Fr: 5'-CTGTCCGTGGAAGCTCTCAACAGC-3'<br>Rv: 5'-TTTTGTTGTCGTTGTGCCAGATGCC-3'             |
| <i>Eef1A1</i> | Fr: 5'-GGCTTCACTGCTCAGGTGATTATC-3'<br>Rv: 5'-ACACATGGGCTTGCCAGGGAC-3'                 |
| <i>Myh4</i>   | Fr: 5'-GGCTTTGAGATCTTTGACTTCAACACC-3'<br>Rv: 5'-GAGAAGATGCCCATCGGCTTCTCG-3'           |
| <i>Mymk</i>   | Fr: 5'-GGCAAAGGTTTCTCCCATGCC-3'<br>Rv: 5'-GTCGGCCAGTGCCATCAGGGA-3'                    |
| <i>Myog</i>   | Fr: 5'-GTCCAACCCAGGAGATCATTGCTC-3'<br>Fr: 5'-CCCCTTAAAAGCCCCCTGCTAC-3'                |
| <i>Tnnt3</i>  | Fr: 5'-TGACAAGCTGAGGGACAAGG-3'<br>Rv: 5'-TGCTTCTGGGCTTGGTCAAT-3'                      |
| <b>ChIP</b>   |                                                                                       |
| <i>Acta1</i>  | Fr: 5'-TGTTGCTGCCCTTCCCAAGCCATATTT-3'<br>Rv: 5'-GCAGACAGCTGGGGATACTCTCCATAT-3'        |
| <i>Cav3</i>   | 4: Fr: 5'-CCTAGGTGTCTCAGTCCAGTTA-3'<br>Rv: 5'-CTGCCACGTAGATCTTGGAAT-3'                |
| <i>Ckm</i>    | Fr: 5'-GACACCCGAGATGCCTGGTT-3'<br>Rv: 5'-GATCCACCAGGGACAGGGTT-3'                      |
| <i>Myh4</i>   | Fr: 5'-CACCCAAGCCGGGAGAAACAGCC-3'<br>Rv: 5'-GAGGAAGGACAGGACAGAGGCACC-3'               |
| <i>Mymk</i>   | Fr: 5'-CTGACAGCAGGGTTAGGGCT-3'<br>Rv: 5'-TGATGTGTACCCTTTCTCCCC-3'                     |
| <i>Myog</i>   | Fr: 5'-ACACCAACTGCTGGGTGCCA-3'<br>Rv: 5'-GAATCACATGTAATCCACTGG-3'A                    |
| <i>Pdx1</i>   | Fr: 5'-GAAGTCCTCCGGACATCTCCCCATACGAAG-3'<br>Rv: 5'-GGATTTTCATCCACGGGAAAGGGAGCTGGAC-3' |
| <i>Tnnt3</i>  | Fr: 5'-GCAGCTGACACCTTTCTGGAAC-3'<br>Rv: 5'-ATTGGCCAGCAGATGGGTGG-3'                    |

### Supplementary Table S2 (spreadsheet)

RNA seq analysis: list of differentially expressed genes comparison DMSO vs FK506 at different time points

### Supplementary Table S3 (spreadsheet)

RNA seq analysis: list of differentially expressed genes comparison different time points to GM conditions

Clusters – list of genes

## Supplementary Figure S1

Schematic overview of the ChIP primers used.

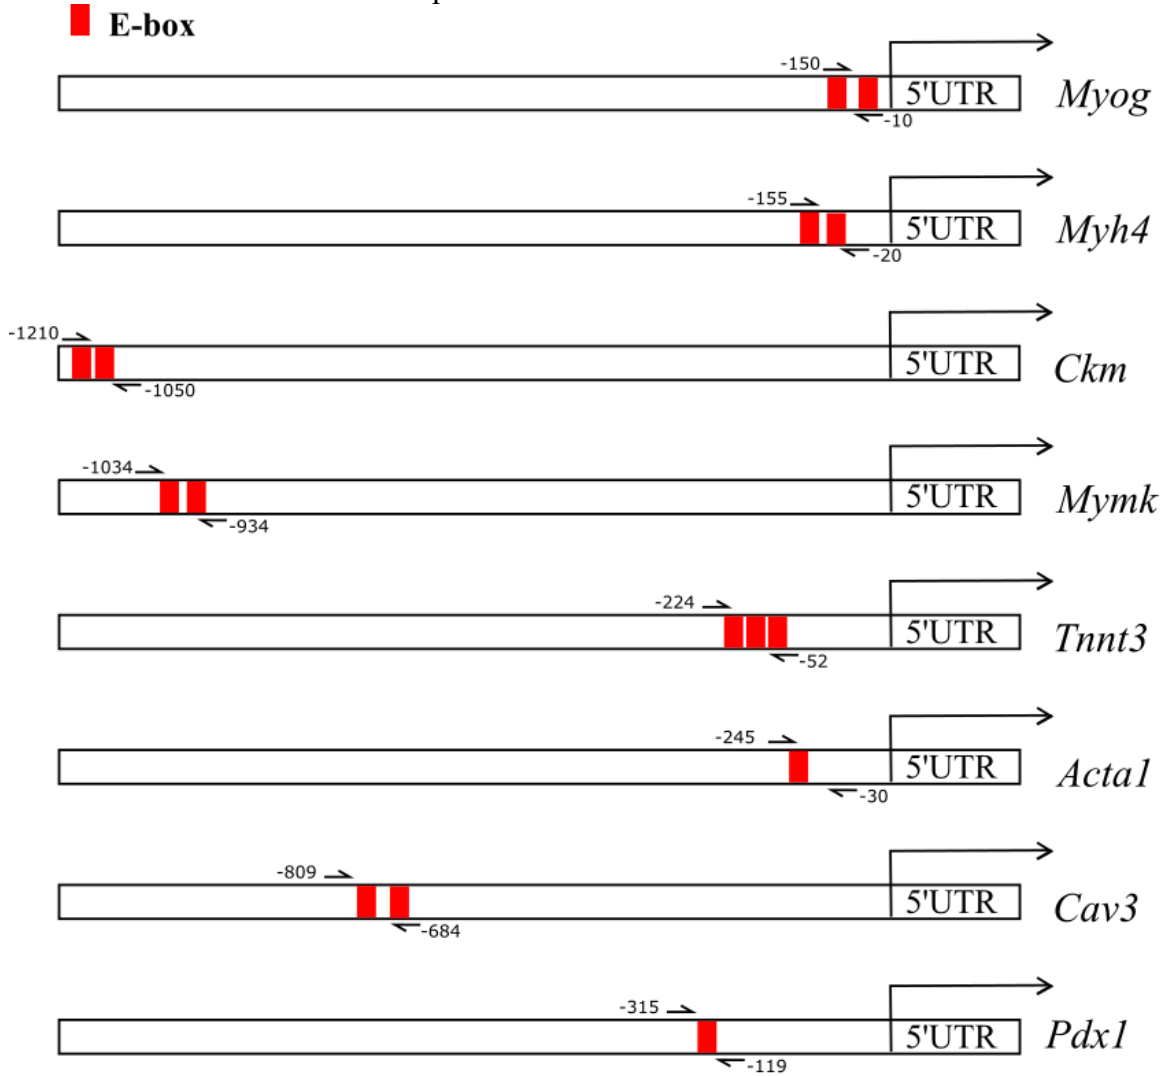

## Supplementary Figure S2

GO analysis of the biological processes shows differences between treatments (DMSO vs FK506) in muscle-related categories

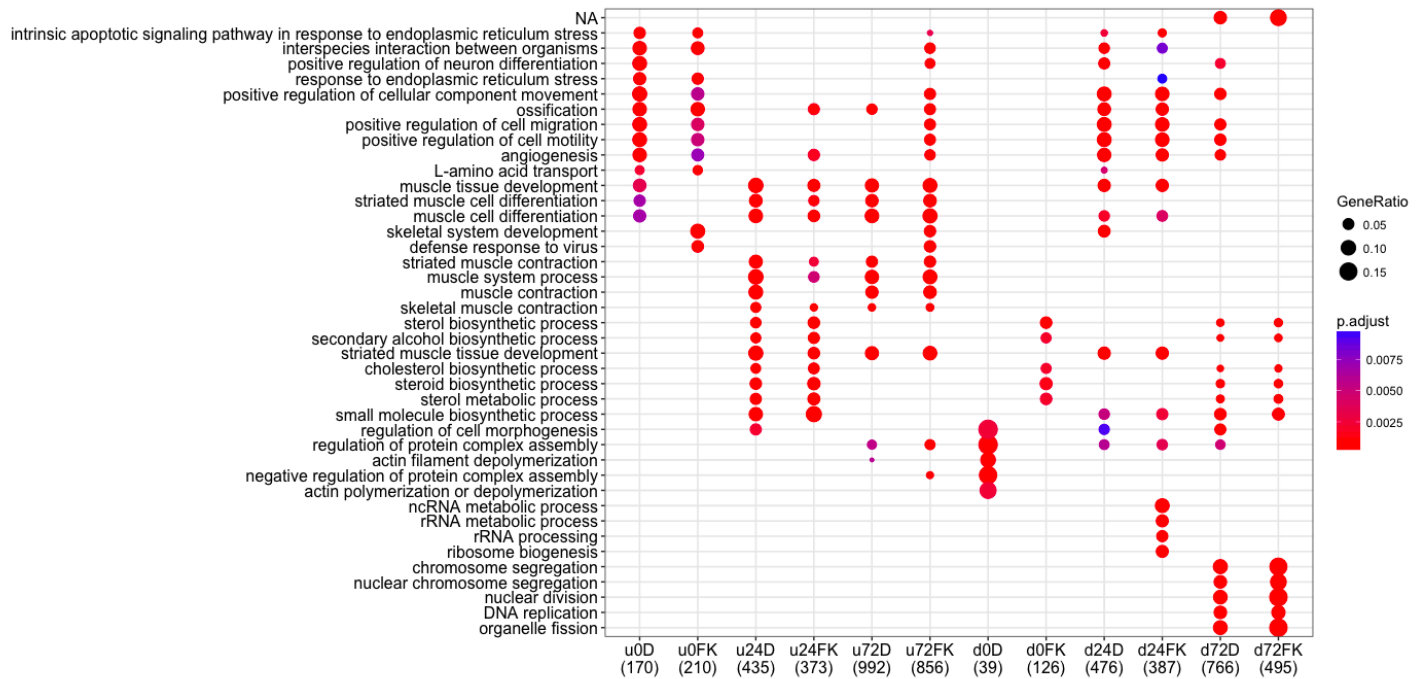

Source: https://www.biorxiv.org/content/10.1101/628768v1.full.pdf
